# Supplementary material for: Preparation of photoluminescence tunable Cu-doped AgInS2 and AgInS2/ZnS nanocrystals and their application as cellular imaging probes
Source: Royal Society of Chemistry journal article supplement (doi:10.1039/c6ra09494e), 2016-01-01
Supplement: c6ra09494e1.pdf [file c6ra09494e1.pdf]

## **Supplementary Content**

### **Preparation of Photoluminescence Tunable Cu-doped AgInS<sub>2</sub> and AgInS<sub>2</sub>/ZnS Nanocrystals and Their Application as Cellular Imaging Probes**

Siqi Chen,<sup>a,b</sup> Violeta Demillo,<sup>a,b</sup> Minggen Lu,<sup>c</sup> Xiaoshan Zhu\*<sup>a,b</sup>

<sup>a</sup> *Department of Electrical and Biomedical Engineering, University of Nevada Reno, NV, USA*

<sup>b</sup> *Biomedical Engineering Program, University of Nevada Reno, NV, USA*

<sup>c</sup> *School of Community Health Sciences, University of Nevada Reno, NV, USA*

\*To whom correspondence should be addressed. Email: xzhu@unr.edu. Phone: 1-775-682-6298.  
Fax: 1-775-784-6627

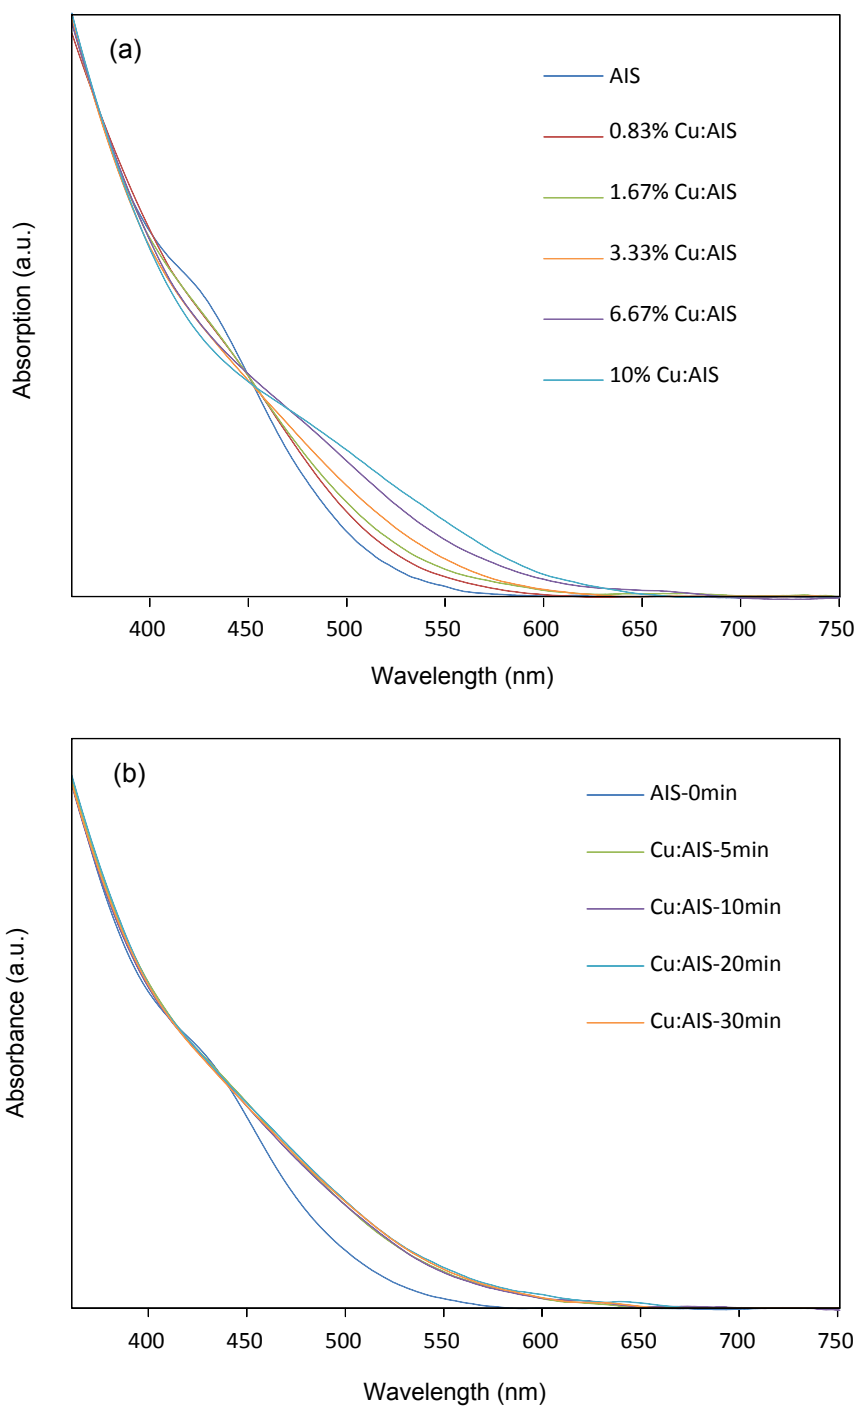

**Figure S1.** (a) Absorption spectra of Cu doped AIS (Cu:AIS) NCs with different Cu initial concentrations. (b) Temporal evolution of absorption spectra of 3.33% Cu:AIS NCs.

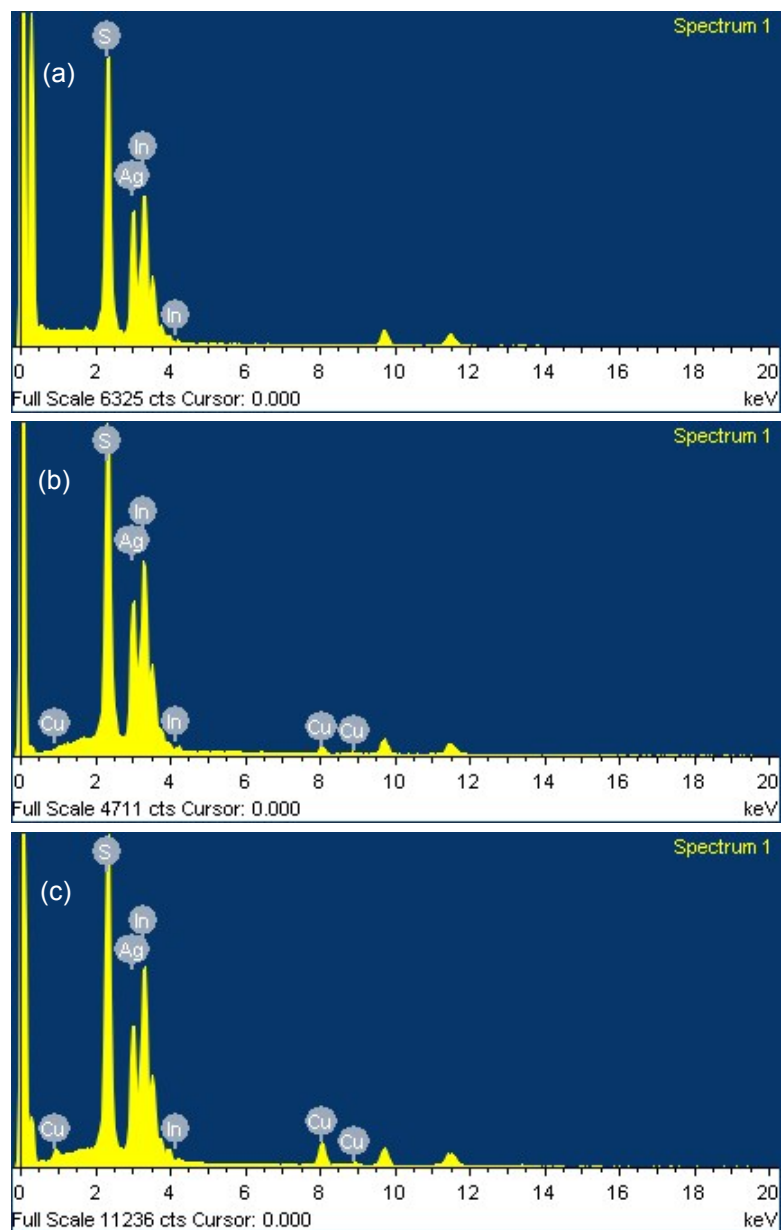

**Figure S2.** EDX spectrum of Cu:AIS NCs with different Cu initial concentrations which illustrates Ag, In, S and Cu elements: (a) AIS NCs, (b) 1.67% Cu:AIS NCs, and (c) 6.67% Cu:AIS NCs. Unlabeled peaks above 9 KeV are gold elements from the gold-mesh grid used for TEM imaging.

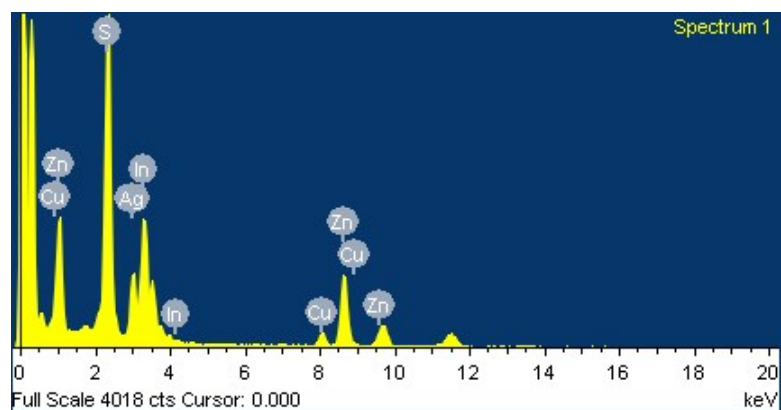

**Figure S3.** EDX spectrum of 6.67% Cu:AgS/ZnS NCs, which illustrates Cu, Ag, In, Zn, and S elements. The elemental composition ratio of Cu, Ag, In, Zn, and S are 2.1%, 9.5%, 19.8%, 12.7%, and 55.8%. Unlabeled peaks above 9 KeV are gold elements from the gold-mesh grid used for TEM imaging.

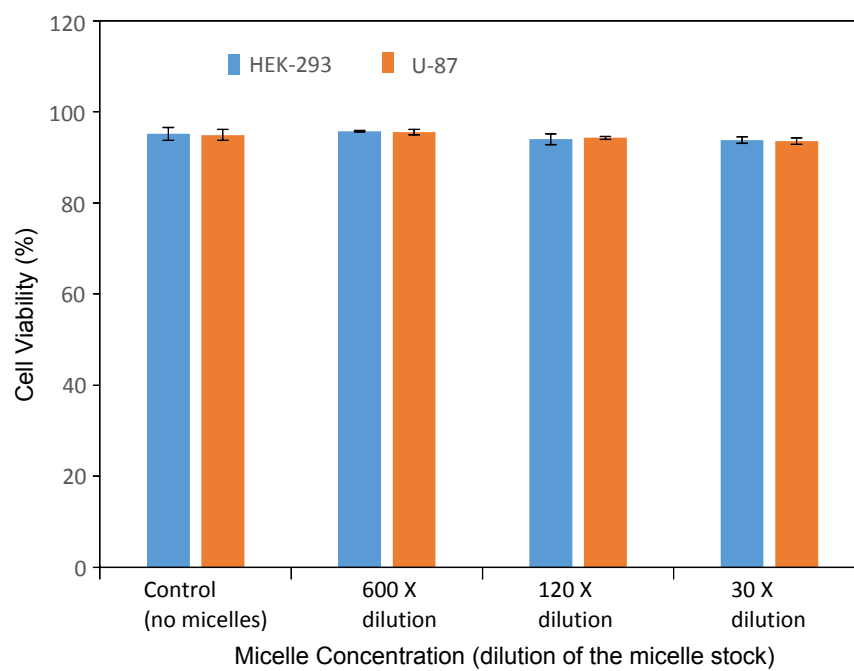

**Figure S4.** Cell viability of U-87 MG cell and HEK-293 cells treated with micelles at difference concentrations over 48 hours.
